# Supplementary material for: A series of polyoxometalate compounds by tuning N sites and numbers of ligands: syntheses, characterization and electrochemical sensing, and photocatalytic and supercapacitor properties
Source: Royal Society of Chemistry journal article supplement (doi:10.1039/d2nj00674j), 2022-01-01
Supplement: d2nj00674j1.pdf [file d2nj00674j1.pdf]

Supplementary Material (ESI) for *New Journal of Chemistry*  
 This journal is © The Royal Society of Chemistry

## A series of polyoxometalate compounds by tuning N sites and numbers of ligands: syntheses, characterization and electrochemical sensing, photocatalytic and supercapacitor properties

Liang Jin, Jun Ying, Yanping Zhang, Chenxi Sun, Aixiang Tian\*, Xiuli Wang\*

**Table S1.** Selected bond distances (Å) and angles (°) for compounds 1–7.

| Compound 1                                                                                                                                                                                                                                                  |            |                                              |            |
|-------------------------------------------------------------------------------------------------------------------------------------------------------------------------------------------------------------------------------------------------------------|------------|----------------------------------------------|------------|
| Ag(1)–O(14) <sup>2</sup>                                                                                                                                                                                                                                    | 2.591(2)   | Ag(2)–O(19) <sup>4</sup>                     | 2.559(2)   |
| Ag(1)–O(2)                                                                                                                                                                                                                                                  | 2.445(2)   | Ag(2)–O(13)                                  | 2.574(2)   |
| Ag(1)–O(1)                                                                                                                                                                                                                                                  | 2.502(3)   | Ag(2)–O(14)                                  | 2.248(2)   |
| Ag(1)–O(7) <sup>1</sup>                                                                                                                                                                                                                                     | 2.528(3)   | Ag(2)–N(3)                                   | 2.176(3)   |
| Ag(1)–O(23) <sup>3</sup>                                                                                                                                                                                                                                    | 2.485(2)   | O(2)–Ag(1)–O(23) <sup>3</sup>                | 72.73(8)   |
| Ag(1)–N(1)                                                                                                                                                                                                                                                  | 2.294(3)   | O(7) <sup>1</sup> –Ag(1)–O(14) <sup>2</sup>  | 70.32(8)   |
| O(2)–Ag(1)–O(14) <sup>2</sup>                                                                                                                                                                                                                               | 95.57(8)   | O(14)–Ag(2)–O(19) <sup>4</sup>               | 86.43(8)   |
| O(2)–Ag(1)–O(1)                                                                                                                                                                                                                                             | 86.37(8)   | O(14)–Ag(2)–O(13)                            | 89.05(8)   |
| O(1)–Ag(1)–O(14) <sup>2</sup>                                                                                                                                                                                                                               | 177.02(9)  | N(3)–Ag(2)–O(19) <sup>4</sup>                | 116.81(10) |
| O(1)–Ag(1)–O(7) <sup>1</sup>                                                                                                                                                                                                                                | 112.37(9)  | N(3)–Ag(2)–O(13)                             | 96.72(11)  |
| Symmetry codes: <sup>1</sup> 1-X,1-Y,1-Z; <sup>2</sup> -1/2+X,3/2-Y,-1/2+Z; <sup>3</sup> 3/2-X,1/2+Y,3/2-Z; <sup>4</sup> 2-X,1-Y,2-Z;<br><sup>5</sup> -X,1-Y,1-Z; <sup>6</sup> 3-X,1-Y,2-Z; <sup>7</sup> 1/2+X,3/2-Y,1/2+Z; <sup>8</sup> 3/2-X,-1/2+Y,3/2-Z |            |                                              |            |
| Compound 2                                                                                                                                                                                                                                                  |            |                                              |            |
| Ag(1)–O(1) <sup>1</sup>                                                                                                                                                                                                                                     | 2.566(3)   | Ag(1)–O(23) <sup>3</sup>                     | 2.477(3)   |
| Ag(1)–O(4) <sup>1</sup>                                                                                                                                                                                                                                     | 2.470(3)   | Ag(1)–O(20) <sup>3</sup>                     | 2.565(3)   |
| Ag(1)–O(25)                                                                                                                                                                                                                                                 | 2.533(3)   | Ag(1)–O(24)                                  | 2.496(3)   |
| Ag(1)–O(2) <sup>2</sup>                                                                                                                                                                                                                                     | 2.542(3)   | O(4) <sup>2</sup> –Ag(1)–O(25)               | 134.76(10) |
| O(2) <sup>1</sup> –Ag(1)–O(1) <sup>2</sup>                                                                                                                                                                                                                  | 161.61(9)  | O(20) <sup>3</sup> –Ag(1)–O(1) <sup>2</sup>  | 126.15(9)  |
| O(4) <sup>2</sup> –Ag(1)–O(1) <sup>2</sup>                                                                                                                                                                                                                  | 83.38(9)   | O(2) <sup>1</sup> –Ag(1)–O(20) <sup>3</sup>  | 68.29(10)  |
| O(4) <sup>2</sup> –Ag(1)–O(2) <sup>1</sup>                                                                                                                                                                                                                  | 113.36(9)  | O(23) <sup>3</sup> –Ag(1)–O(1) <sup>2</sup>  | 73.30(10)  |
| O(4) <sup>2</sup> –Ag(1)–O(20) <sup>3</sup>                                                                                                                                                                                                                 | 74.59(11)  | O(23) <sup>3</sup> –Ag(1)–O(2) <sup>1</sup>  | 101.64(10) |
| O(4) <sup>2</sup> –Ag(1)–O(23) <sup>3</sup>                                                                                                                                                                                                                 | 122.86(10) | O(23) <sup>3</sup> –Ag(1)–O(20) <sup>3</sup> | 78.72(9)   |
| O(4) <sup>2</sup> –Ag(1)–O(24)                                                                                                                                                                                                                              | 68.72(9)   | O(23) <sup>3</sup> –Ag(1)–O(24)              | 168.41(10) |
| Symmetry codes: <sup>1</sup> 1/2-X,-1/2+Y,3/2-Z; <sup>2</sup> 1-X,1-Y,2-Z; <sup>3</sup> 1/2+X,1/2-Y,1/2+Z; <sup>4</sup> 1/2-X,1/2+Y,3/2-Z; <sup>5</sup> -<br>1/2+X,1/2-Y,-1/2+Z                                                                             |            |                                              |            |
| Compound 3                                                                                                                                                                                                                                                  |            |                                              |            |
| Co(1)–O(3)                                                                                                                                                                                                                                                  | 2.137(18)  | Co(1)–O(4)                                   | 2.135(18)  |
| Co(1)–N(1)                                                                                                                                                                                                                                                  | 2.12(2)    | Co(1)–N(6)                                   | 2.14(2)    |

**Supplementary Material (ESI) for *New Journal of Chemistry***  
**This journal is © The Royal Society of Chemistry**

|                              |         |                               |           |
|------------------------------|---------|-------------------------------|-----------|
| Co(1)–N(9) <sup>1</sup>      | 2.14(2) | Co(1)–O(1W)                   | 2.057(19) |
| O(3)–Co(1)–N(6)              | 90.4(8) | O(3)–Co(1)–N(9) <sup>1</sup>  | 88.8(8)   |
| O(4)–Co(1)–O(3)              | 92.5(7) | O(4)–Co(1)–N(6)               | 84.8(8)   |
| O(4)–Co(1)–N(9) <sup>1</sup> | 88.2(8) | N(1)–Co(1)–O(3)               | 175.5(8)  |
| N(1)–Co(1)–O(4)              | 90.7(8) | N(1)–Co(1)–N(6)               | 93.2(9)   |
| N(1)–Co(1)–N(9) <sup>1</sup> | 88.0(9) | N(9) <sup>1</sup> –Co(1)–N(6) | 172.9(9)  |
| O(1W)–Co(1)–O(3)             | 86.8(8) | O(1W)–Co(1)–O(4)              | 177.1(8)  |
| O(1W)–Co(1)–N(1)             | 90.2(9) | O(1W)–Co(1)–N(6)              | 92.5(9)   |

Symmetry codes: <sup>1</sup>1/2+X,3/2-Y,1/2+Z; <sup>2</sup>-1/2+X,3/2-Y,-1/2+Z

**Compound 4**

|                               |           |                                |            |
|-------------------------------|-----------|--------------------------------|------------|
| Ni(1)–O(15)                   | 2.032(3)  | Ni(1)–O(1W)                    | 2.103(4)   |
| Ni(1)–N(3) <sup>3</sup>       | 2.037(4)  | Ni(1)–O(25)                    | 2.019(3)   |
| Ni(1)–N(2)                    | 2.044(4)  | Ni(1)–N(1)                     | 2.083(4)   |
| O(15)–Ni(1)–N(3) <sup>3</sup> | 84.94(15) | O(15)–Ni(1)–O(1W)              | 172.17(15) |
| O(15)–Ni(1)–N(2)              | 87.23(14) | O(15)–Ni(1)–N(1)               | 97.84(15)  |
| O(25)–Ni(1)–O(15)             | 86.01(13) | O(25)–Ni(1)–N(3) <sup>3</sup>  | 90.06(14)  |
| O(25)–Ni(1)–O(1W)             | 87.81(14) | O(25)–Ni(1)–N(2)               | 169.53(14) |
| O(25)–Ni(1)–N(1)              | 94.67(14) | N(3) <sup>3</sup> –Ni(1)–O(1W) | 90.26(15)  |
| N(3) <sup>3</sup> –Ni(1)–N(2) | 97.30(14) | N(3) <sup>3</sup> –Ni(1)–N(1)  | 174.66(16) |
| N(2)–Ni(1)–O(1W)              | 99.54(15) | N(2)–Ni(1)–N(1)                | 78.34(15)  |

Symmetry codes: <sup>1</sup>1-X,2-Y,2-Z; <sup>2</sup>1-X,1-Y,2-Z; <sup>3</sup>-X,1-Y,1-Z

**Compound 5**

|                               |            |                                |            |
|-------------------------------|------------|--------------------------------|------------|
| Co(1)–O(13)                   | 2.059(4)   | Co(1)–O(12)                    | 2.039(4)   |
| Co(1)–N(2)                    | 2.083(4)   | Co(1)–N(1) <sup>3</sup>        | 2.080(5)   |
| Co(1)–O(1W)                   | 2.122(4)   | Co(1)–N(3)                     | 2.144(4)   |
| O(13)–Co(1)–N(2)              | 85.79(16)  | O(13)–Co(1)–N(1) <sup>3</sup>  | 83.33(17)  |
| O(13)–Co(1)–O(1W)             | 171.31(16) | O(13)–Co(1)–N(3)               | 99.69(17)  |
| O(12)–Co(1)–O(13)             | 85.96(16)  | O(12)–Co(1)–N(2)               | 167.93(16) |
| O(12)–Co(1)–N(1) <sup>3</sup> | 89.69(16)  | O(12)–Co(1)–O(1W)              | 88.16(16)  |
| O(12)–Co(1)–N(3)              | 95.61(17)  | N(2)–Co(1)–O(1W)               | 100.96(16) |
| N(2)–Co(1)–N(3)               | 77.13(17)  | N(1) <sup>3</sup> –Co(1)–O(1W) | 90.25(18)  |
| N(2)–Co(1)–N(1) <sup>3</sup>  | 98.08(16)  | N(1) <sup>3</sup> –Co(1)–N(3)  | 174.06(17) |

Symmetry codes: <sup>1</sup>1-X,-Y,2-Z; <sup>2</sup>1-X,1-Y,2-Z; <sup>3</sup>1-X,1-Y,1-Z

**Compound 6**

|                               |           |                               |            |
|-------------------------------|-----------|-------------------------------|------------|
| Ag(1)–N(1) <sup>1</sup>       | 2.309(4)  | Ag(1)–N(2) <sup>2</sup>       | 2.254(3)   |
| Ag(1)–N(7)                    | 2.253(3)  | Ag(1)–O(6)                    | 2.713(3)   |
| N(1) <sup>1</sup> –Ag(1)–O(6) | 78.35(12) | N(2) <sup>2</sup> –Ag(1)–O(6) | 105.41(13) |
| C(6)–N(1)–Ag(1) <sup>1</sup>  | 129.8(3)  | N(7)–Ag(1)–O(6)               | 97.70(13)  |
| N(7)–N(1)–Ag(1) <sup>1</sup>  | 122.8(3)  | N(7)–Ag(1)–N(2) <sup>2</sup>  | 130.38(13) |

|                              |            |                                            |            |
|------------------------------|------------|--------------------------------------------|------------|
| N(7)–Ag(1)–N(1) <sup>1</sup> | 108.44(12) | N(2) <sup>2</sup> –Ag(1)–N(1) <sup>1</sup> | 118.82(13) |
| Mo(2)–O(6)–Ag(1)             | 131.3(2)   | C(2)–N(2)–Ag(1) <sup>4</sup>               | 120.0(3)   |
| C(1)–N(2)–Ag(1) <sup>4</sup> | 121.2(3)   | N(1)–N(7)–Ag(1)                            | 124.3(3)   |
| C(7)–N(7)–Ag(1)              | 125.0(3)   | O(8)–Mo(2)–O(10)                           | 72.44(11)  |
| C(6)–N(3)–C(8)               | 129.5(3)   | C(7)–N(3)–C(6)                             | 105.0(3)   |

Symmetry codes: <sup>1</sup>2-X,1-Y,-Z; <sup>2</sup>1+X,+Y,+Z; <sup>3</sup>2-X,-Y,1-Z; <sup>4</sup>-1+X,+Y,+Z

| Compound 7                                  |            |                                            |            |
|---------------------------------------------|------------|--------------------------------------------|------------|
| Co(1)–O(1W)                                 | 2.0664(19) | Co(1)–O(1W) <sup>2</sup>                   | 2.0664(19) |
| Co(1)–N(5) <sup>3</sup>                     | 2.252(2)   | Co(1)–N(5) <sup>4</sup>                    | 2.252(2)   |
| Co(1)–N(3)                                  | 2.160(2)   | Co(1)–N(3) <sup>2</sup>                    | 2.160(2)   |
| O(1W)–Co(1)–O(1W) <sup>2</sup>              | 180.0      | O(1W)–Co(1)–N(5) <sup>3</sup>              | 90.56(8)   |
| O(1W) <sup>2</sup> –Co(1)–N(5) <sup>3</sup> | 89.44(8)   | O(1W)–Co(1)–N(5) <sup>4</sup>              | 89.44(8)   |
| O(1W) <sup>2</sup> –Co(1)–N(5) <sup>4</sup> | 90.56(8)   | O(1W)–Co(1)–N(3) <sup>2</sup>              | 92.66(8)   |
| O(1W) <sup>2</sup> –Co(1)–N(3) <sup>2</sup> | 87.34(8)   | O(1W) <sup>2</sup> –Co(1)–N(3)             | 92.66(8)   |
| O(1W)–Co(1)–N(3)                            | 87.35(8)   | N(5) <sup>4</sup> –Co(1)–N(5) <sup>3</sup> | 180.0      |
| N(3)–Co(1)–N(5) <sup>4</sup>                | 92.47(8)   | N(3)–Co(1)–N(5) <sup>3</sup>               | 87.53(8)   |
| N(3) <sup>2</sup> –Co(1)–N(5) <sup>3</sup>  | 92.47(8)   | N(3) <sup>2</sup> –Co(1)–N(5) <sup>4</sup> | 87.53(8)   |

Symmetry codes: <sup>1</sup>2-X,1-Y,1-Z; <sup>2</sup>-X,1-Y,-Z; <sup>3</sup>-1+X,+Y,+Z; <sup>4</sup>1-X,1-Y,-Z; <sup>5</sup>1+X,+Y,+Z

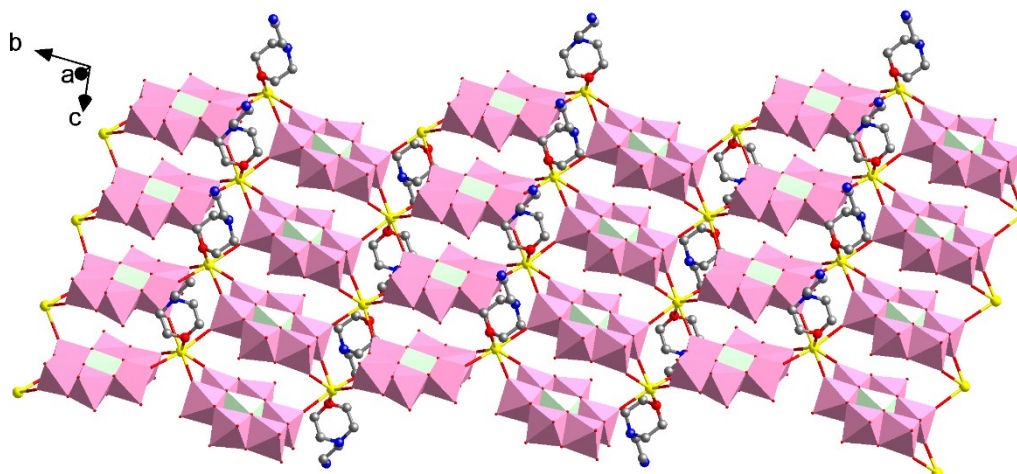

Fig. S1. The 2D layer of compound 2.

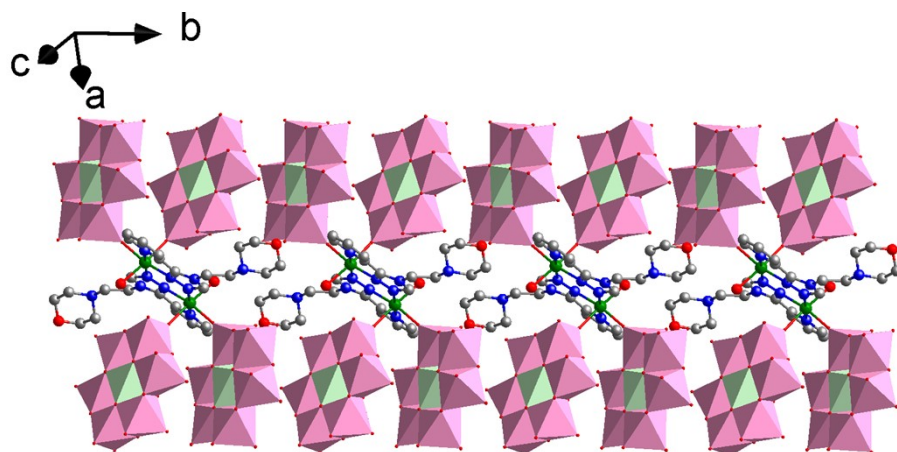

Fig. S2. The 1D sandwich-type chain of compound 4.

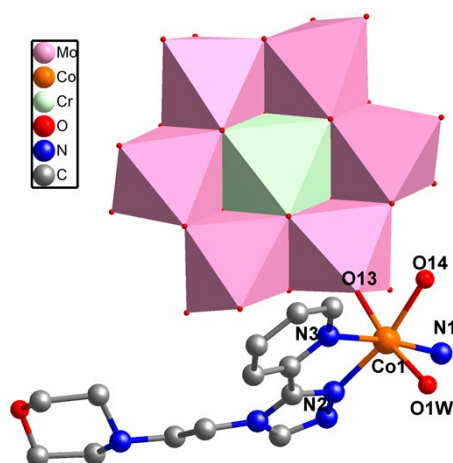

Fig. S3. The unit cell diagram of compound 5 (asymmetric unit). For the sake of clarity, crystal water molecules and hydrogen atoms are omitted here.

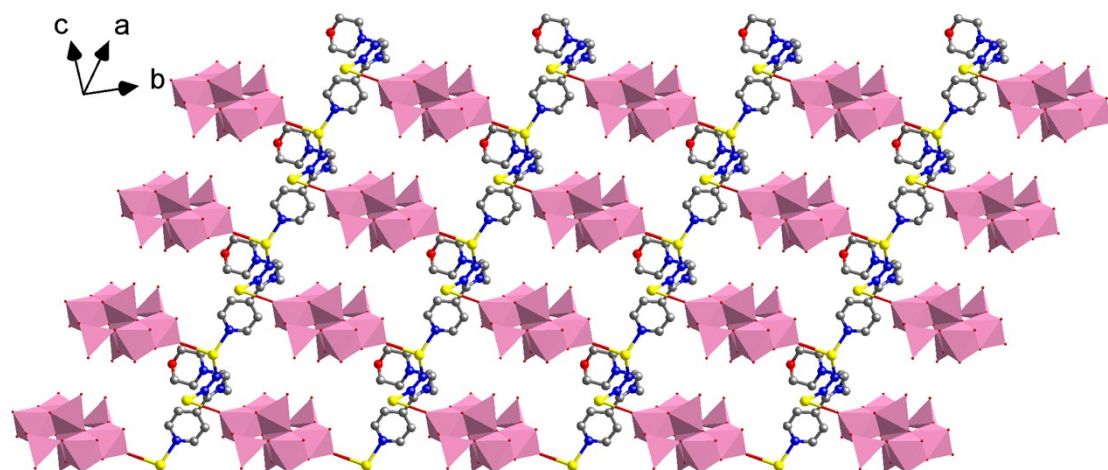

Fig. S4. The 2D layer of compound 6.

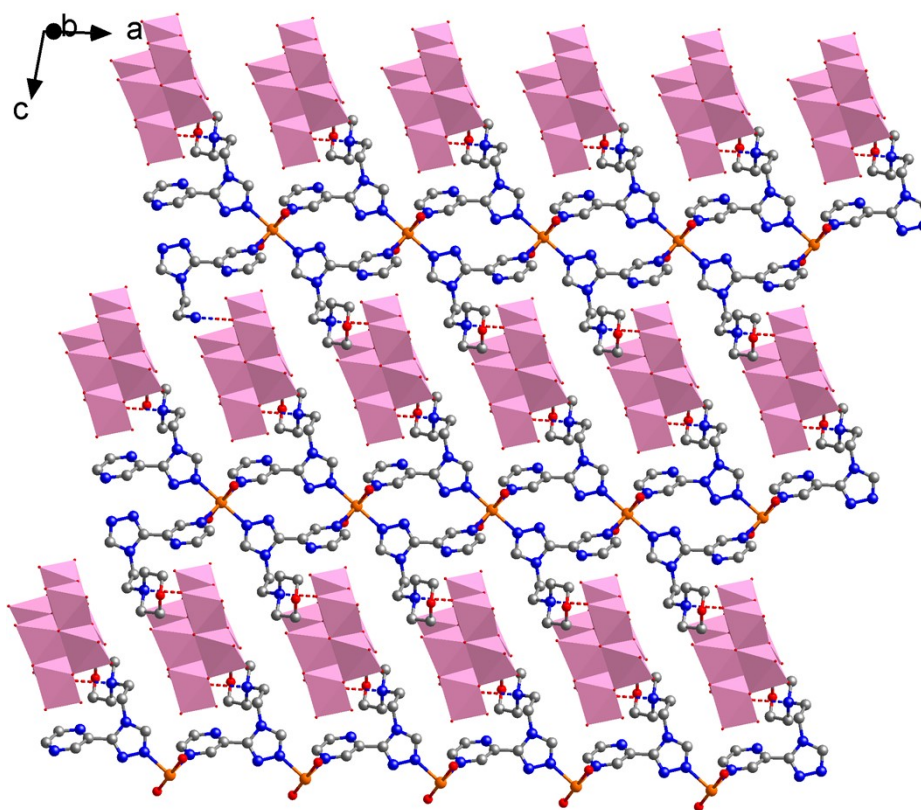

Fig. S5. The 2D layer of compound 7.

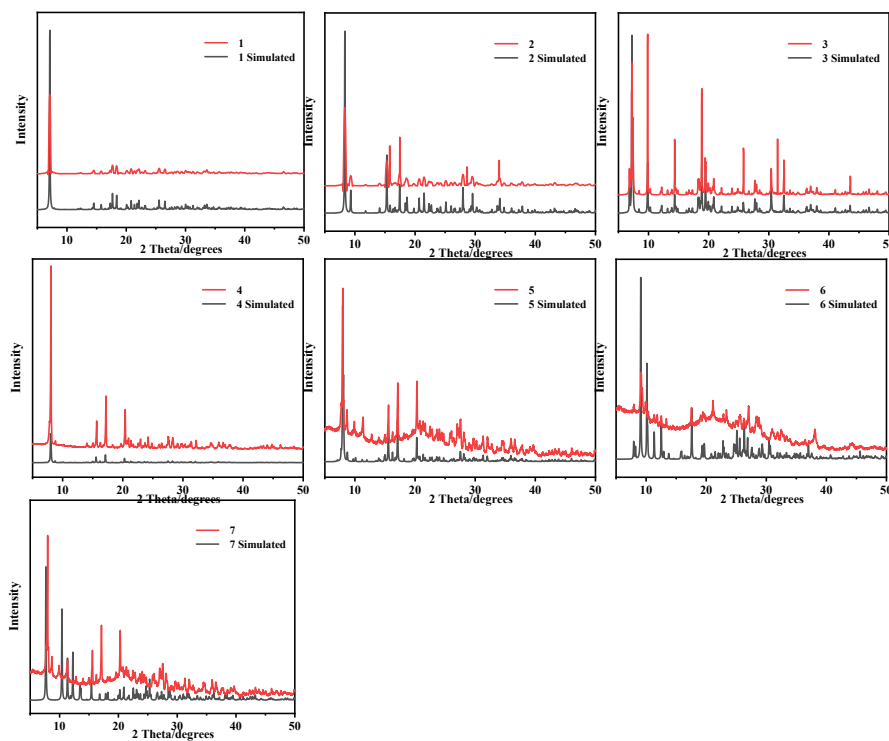

Fig. S6. The PXRD patterns of compounds 1–7.

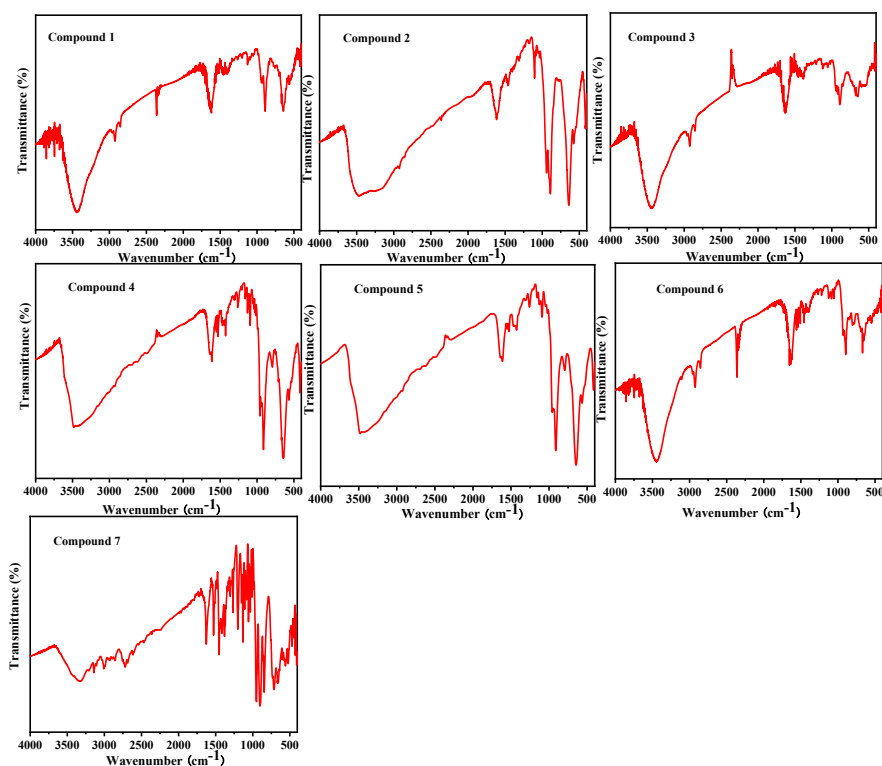

Fig. S7. The IR spectra of compounds 1–7.

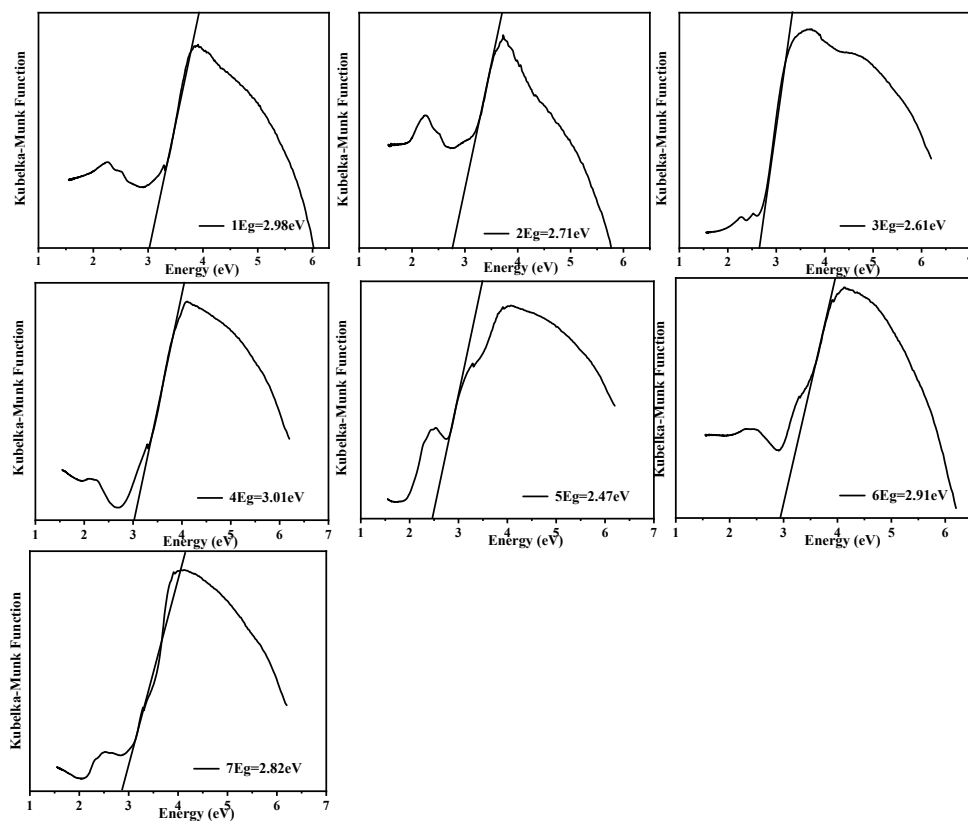

Fig. S8. The Diffuse reflection spectra of compounds 1–7.

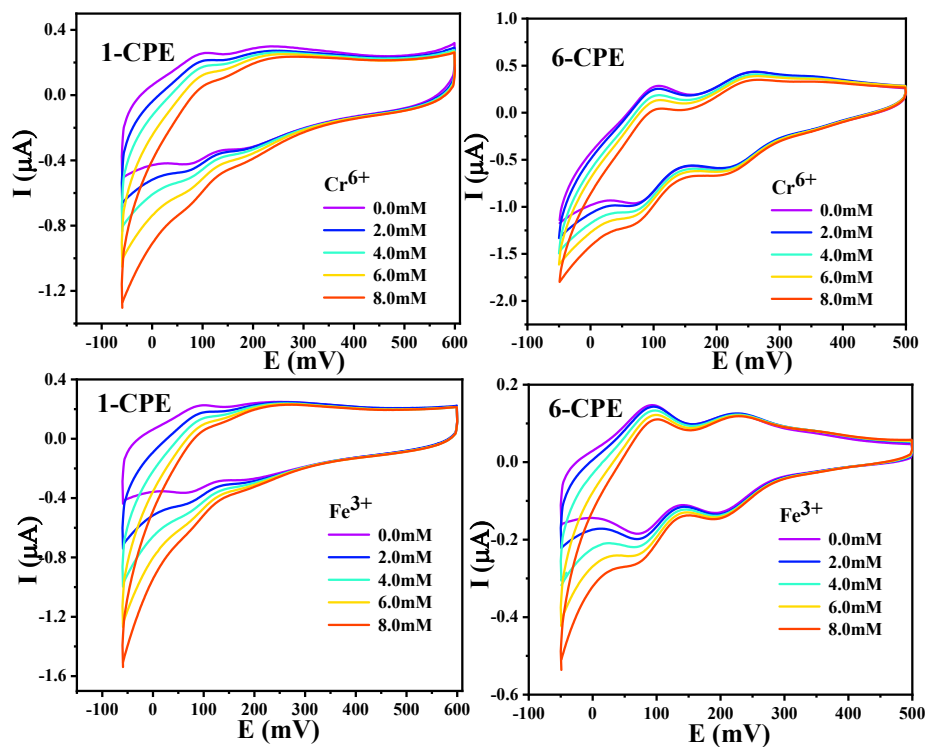

**Fig. S9.** Cyclic voltammograms of the 1-, 6-CPEs in 0.1 M H<sub>2</sub>SO<sub>4</sub> + 0.5 M Na<sub>2</sub>SO<sub>4</sub> aqueous solution containing 0; 2; 4; 6 and 8 mM Cr(VI) and Fe(III) (Scan rate: 200 mV·s<sup>-1</sup>).

**Table S2.** Experimental data for detecting Cr(VI), Fe(III), and KNO<sub>2</sub> using 1-, 6-CPEs as amperometric sensors.

| CPE   | Test substance   | Response time(s) | Concentration range(M)                   | Sensitivity (μA mM <sup>-1</sup> ) | Correlation coefficient | Detection limit(M)    |
|-------|------------------|------------------|------------------------------------------|------------------------------------|-------------------------|-----------------------|
| 1-CPE | Cr(VI)           | 2.16             | 2×10 <sup>-3</sup> –4.6×10 <sup>-2</sup> | 0.50898                            | 0.99155                 | 4.3×10 <sup>-3</sup>  |
| 6-CPE | Cr(VI)           | 5.13             | 4×10 <sup>-3</sup> –4.6×10 <sup>-2</sup> | 0.17742                            | 0.99524                 | 5.9×10 <sup>-3</sup>  |
| 1-CPE | Fe(III)          | 1.44             | 2×10 <sup>-3</sup> –4.6×10 <sup>-2</sup> | 1.40824                            | 0.99945                 | 3.9×10 <sup>-3</sup>  |
| 6-CPE | Fe(III)          | 1.26             | 2×10 <sup>-3</sup> –4.6×10 <sup>-2</sup> | 0.15909                            | 0.99993                 | 5.7×10 <sup>-4</sup>  |
| 1-CPE | KNO <sub>2</sub> | 2.07             | 2×10 <sup>-3</sup> –3.2×10 <sup>-2</sup> | 2.78635                            | 0.99829                 | 1.24×10 <sup>-2</sup> |
| 6-CPE | KNO <sub>2</sub> | 3.42             | 6×10 <sup>-3</sup> –4.6×10 <sup>-2</sup> | 0.50389                            | 0.99940                 | 2.9×10 <sup>-3</sup>  |

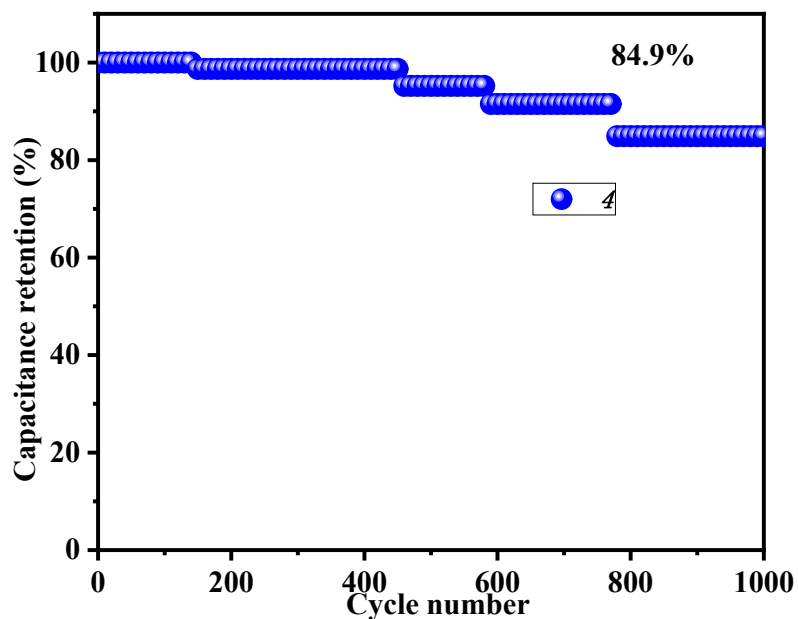

**Fig. S10.** The Cycling performance of 4-GCE during 1000 cycles at the current densities of 5 A  $\text{cm}^{-2}$ .

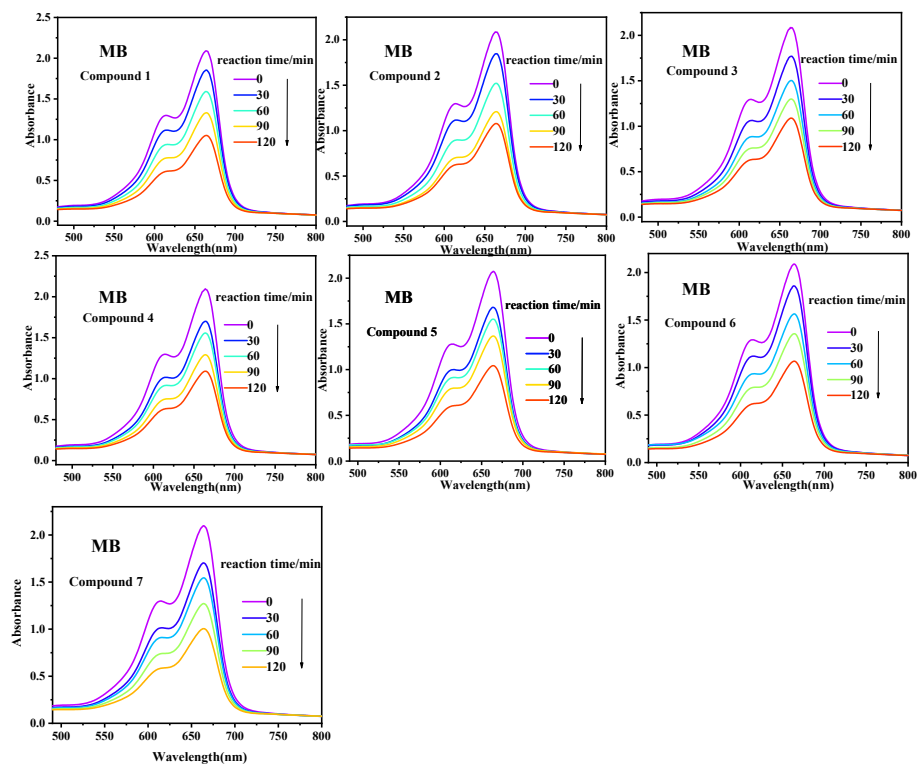

**Fig. S11.** The UV-vis absorption spectra of aqueous MB under UV light irradiation in the presence of compounds 1–7.



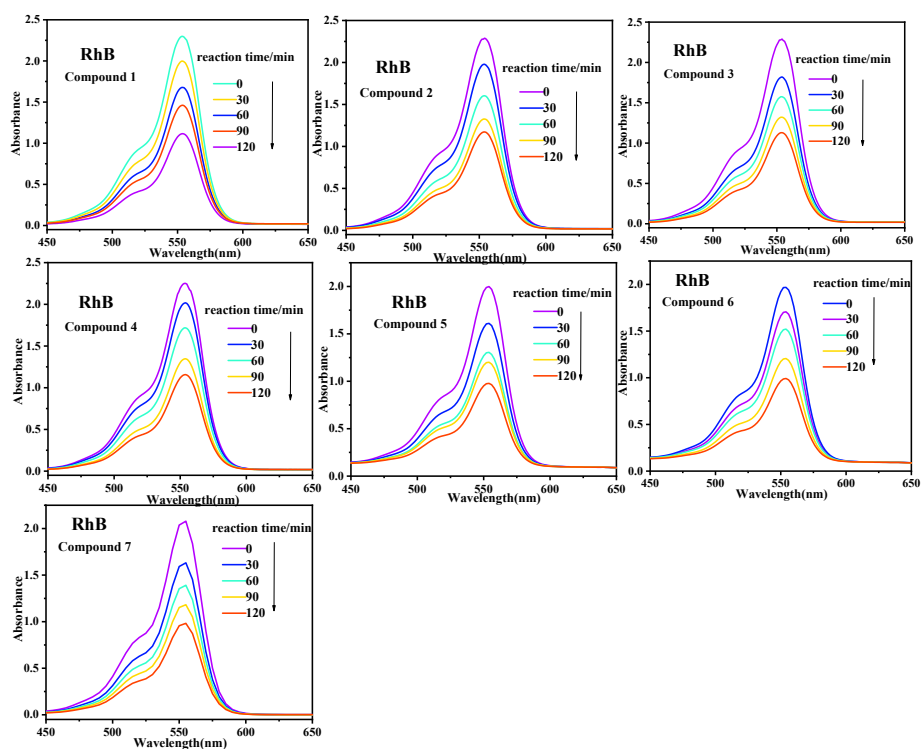

**Fig. S12.** The UV-vis absorption spectra of aqueous RhB under UV light irradiation in the present of compounds 1–7.

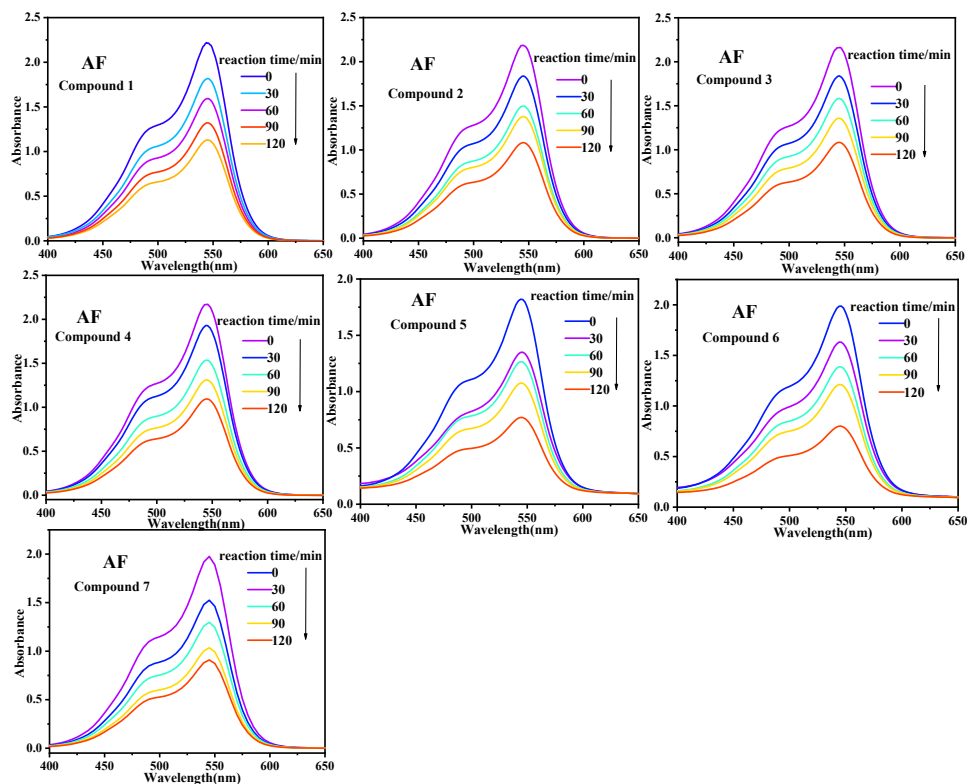

**Fig. S13.** The UV-vis absorption spectra of aqueous AF under UV light irradiation in the present of compounds 1–7.

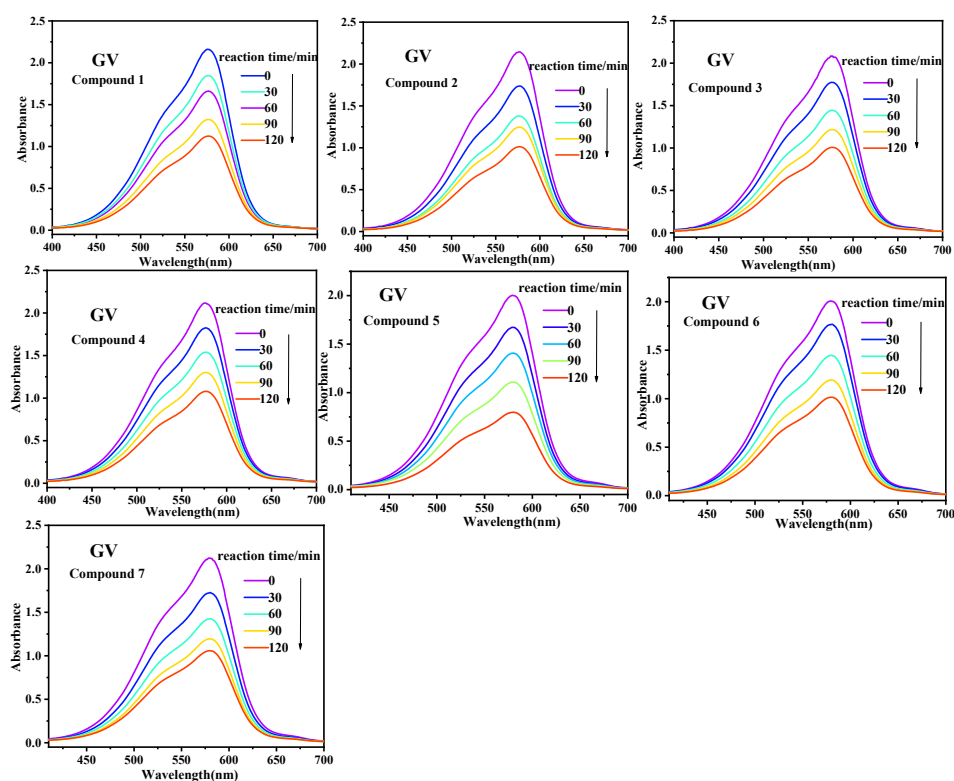

**Fig. S14.** The UV-vis absorption spectra of aqueous GV under UV light irradiation in the present of compounds 1–7.

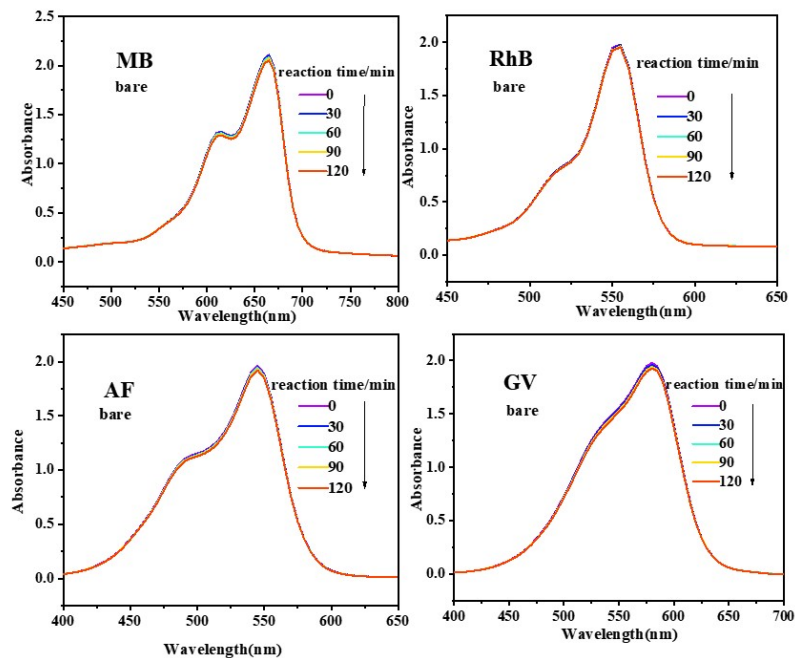

**Fig. S15.** Absorption spectra of the MB, RhB, AF and GV solution during the decomposition reaction under UV irradiation without the coordination polymers.

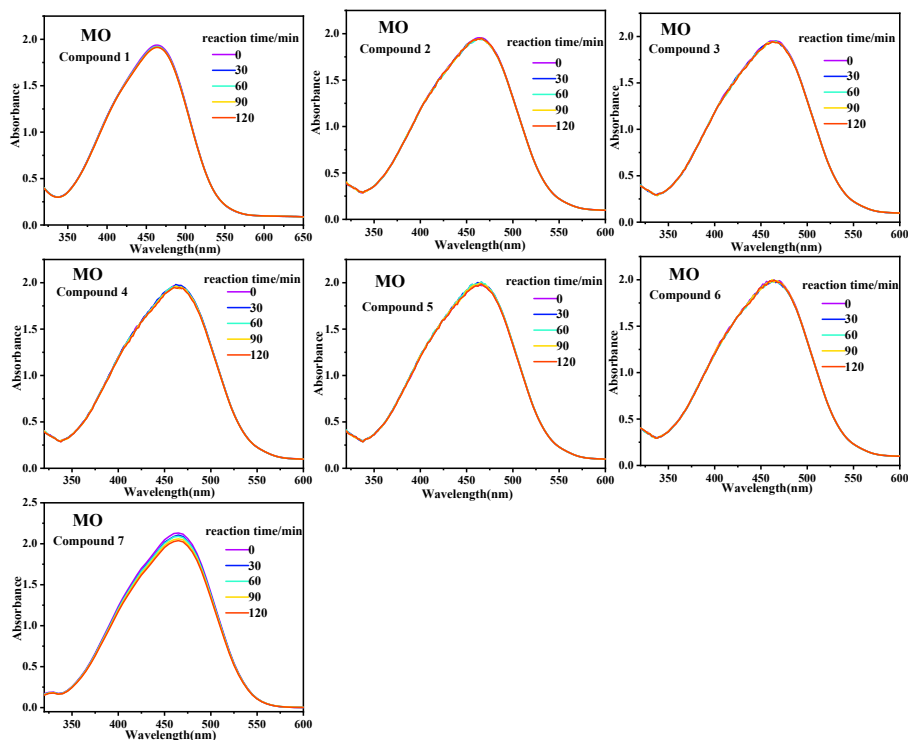

Fig. S16. The UV-vis absorption spectra of aqueous MO under UV light irradiation in the present of compounds 1–7.

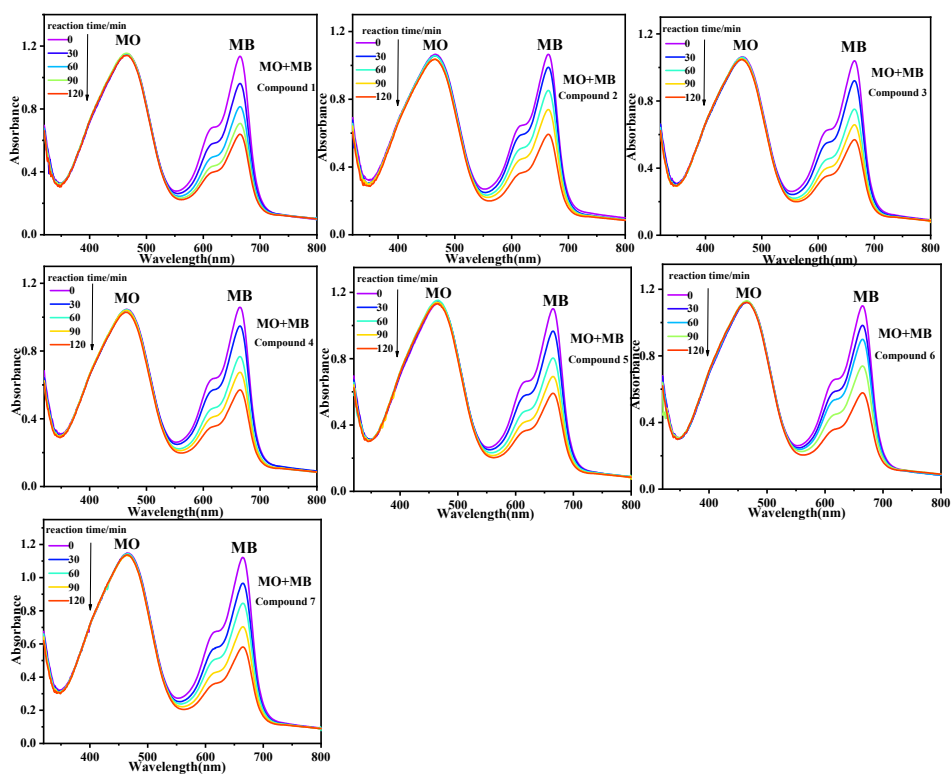

Fig. S17. The UV-vis absorption spectra of aqueous MO and MB under UV light irradiation in the present of compounds 1–7.

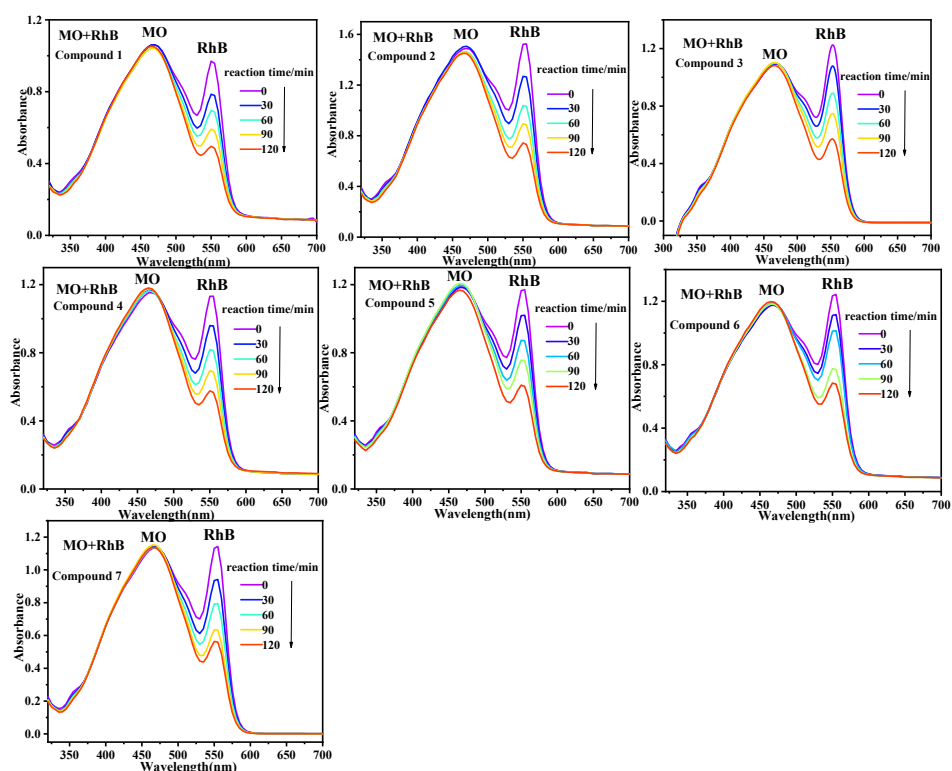

**Fig. S18.** The UV-vis absorption spectra of aqueous MO and RhB under UV light irradiation in the present of compounds 1–7.

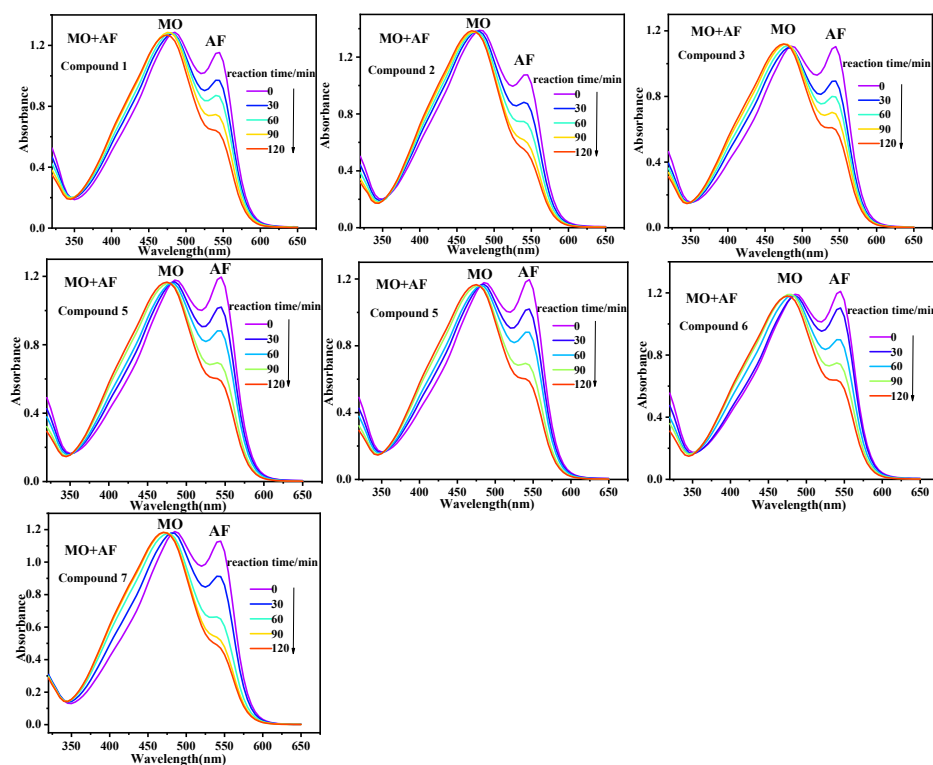

**Fig. S19.** The UV-vis absorption spectra of aqueous MO and AF under UV light irradiation in the present of compounds 1–7.

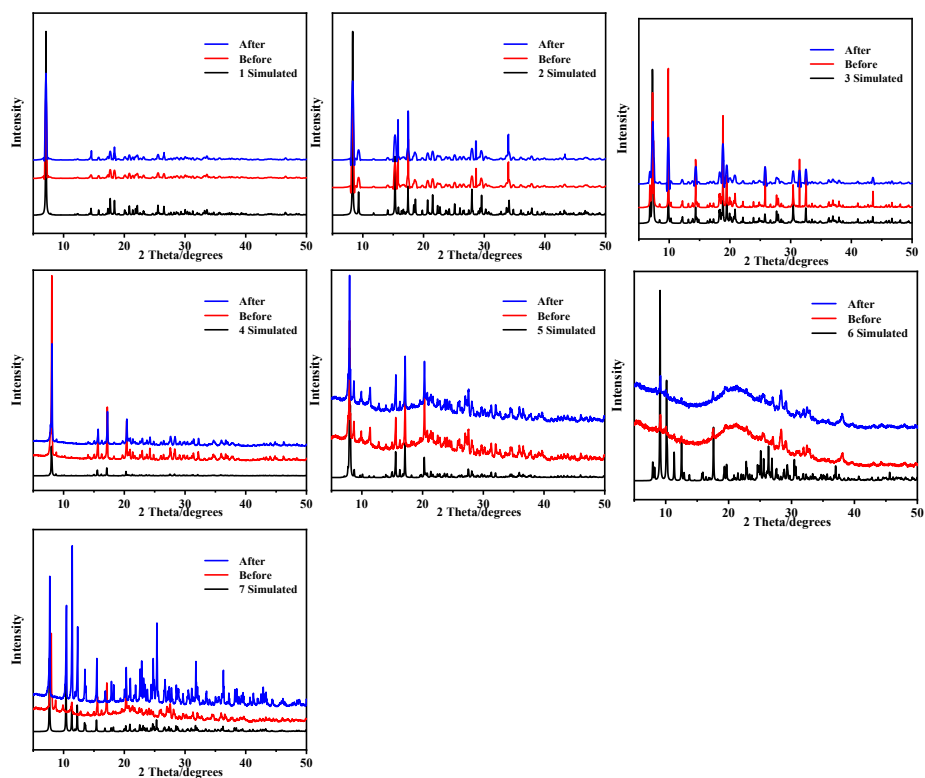

**Fig. S20.** The PXRD patterns of compounds 1–7 (before and after photocatalysis).
